# Supplementary material for: Automated platforms for reaction self-optimization in flow
Source: Royal Society of Chemistry journal article supplement (doi:10.1039/c9re00116f), 2019-01-01
Supplement: c9re00116f1.pdf [file c9re00116f1.pdf]

**Supporting Information**

**Automated platforms for reaction self-optimization in flow**

Carlos Mateos,\* María José Nieves-Remacha\* and Juan A. Rincón

Table SI-1: References of the latest developments on self-optimization automated platforms.

| Item | Title                                                                                                             | Full authors list                                                              | Reference                                       | Variables                                                               | Reaction                                               | Algorithm                                                         | Analysis       | Automation       |
|------|-------------------------------------------------------------------------------------------------------------------|--------------------------------------------------------------------------------|-------------------------------------------------|-------------------------------------------------------------------------|--------------------------------------------------------|-------------------------------------------------------------------|----------------|------------------|
| 1    | Intelligent routes to the controlled synthesis of nanoparticles                                                   | S. Krishnadasan, R. J. C. Brown, A. J. deMello and J. C. deMello               | Lab Chip, 2007, 7, 1434–1441                    | Flowrates, temperature                                                  | Synthesis of CdSe nanoparticles                        | SNOBFIT                                                           | Inline UV cell | LabVIEW, Matlab  |
| 2    | An Automated Microfluidic System for Online Optimization in Chemical Synthesis                                    | J. P. McMullen, K.F. Jensen                                                    | Org. Process Res. Dev., 2010, 14 (5), 1169–1176 | Equivalents and residence time                                          | Knoevenagel condensation                               | Nelder-Mead Simplex , SNOBFIT , steepest descent                  | HPLC           | LabView, Matlab  |
| 3    | An Integrated Microreactor System for Self-Optimization of a Heck Reaction: From Micro- to Mesoscale Flow Systems | J. P. McMullen, M. T. Stone, S. L. Buchwald, K. F. Jensen                      | Angew. Chem. Int. Ed. 2010, 49, 7076 – 7080     | Equivalents and residence time                                          | Heck                                                   | Nelder–Mead Simplex Method                                        | HPLC           | LabView, Matlab  |
| 4    | Self-Optimizing Continuous Reactions in Supercritical Carbon Dioxide                                              | Parrot, A. J., Bourne, R. A., Akien, G. R., Irvine, D. J. and Poliakoff, M.    | Angew. Chem. Int. Ed. 2011, 50 (16), 3788 –3792 | Temperature, pressure, flowrate                                         | Methylation in supercritical CO2                       | Super modified Simplex                                            | Online GC      | Matlab           |
| 5    | Automated Multitrajectory Method for Reaction Optimization in a Microfluidic System using Online IR Analysis      | J. S. Moore and K. F. Jensen                                                   | Org. Process Res. Dev. 2012, 16, 1409–1415      | Temperature and residence time                                          | Paal–Knorr                                             | Steepest descent, conjugate gradient, conjugate gradient + Armijo | Online IR      | LabView , Matlab |
| 6    | Organic Synthesis: March of the Machines                                                                          | Steven V. Ley, Daniel E. Fitzpatrick, Richard. J. Ingham, and Rebecca M. Myers | Angew. Chem. Int. Ed. 2015, 54, 3449 – 3464     | Temperature, residence time, concentration, equivalents of two reagents | 3D heterogeneous catalytic reaction, 5D Appel reaction | Modified Simplex                                                  | Flow IR        | Internet-based   |
| 7    | Self optimizing synthetic organic reactor system using real-time in-line NMR spectroscopy                         | V. Sans, L. Porwol, V. Dragone, L. Cronin                                      | Chem. Sci., 2015, 6, 1258                       | Concentration s and residence time                                      | Imine formation                                        | Modified Nelder-Mead Simplex                                      | Flow-NMR       | LabView          |
| 8    | Automatic discovery and optimization of chemical processes.                                                       | Houben, C. & Lapkin, A. A.                                                     | Curr. Opin. Chem. Eng., 2015, 9, 1–7            | REVIEW                                                                  | REVIEW                                                 | REVIEW                                                            | REVIEW         | REVIEW           |

Table SI-1: References of the latest developments on self-optimization automated platforms (Cont.)

| Item | Title                                                                                                                  | Full authors list                                                                                                                                                       | Reference                                            | Variables                                                                                                             | Reaction                                                                  | Algorithm                                                    | Analysis                   | Automation       |
|------|------------------------------------------------------------------------------------------------------------------------|-------------------------------------------------------------------------------------------------------------------------------------------------------------------------|------------------------------------------------------|-----------------------------------------------------------------------------------------------------------------------|---------------------------------------------------------------------------|--------------------------------------------------------------|----------------------------|------------------|
| 9    | Machine-Assisted Organic Synthesis                                                                                     | Prof. Steven V. Ley Daniel E. Fitzpatrick Dr. Rebecca M. Myers Dr. Claudio Battilocchio Dr. Richard. J. Ingham                                                          | Angewandte Chemie Int Ed, 2015, 54 (35), 10122-10136 | REVIEW                                                                                                                | REVIEW                                                                    | REVIEW                                                       | REVIEW                     | REVIEW           |
| 10   | Feedback in Flow for Accelerated Reaction Development                                                                  | Brandon J. Reizman and Klavs F. Jensen                                                                                                                                  | Acc. Chem. Res. 2016, 49, 1786–1796                  | Discrete and continuous variables                                                                                     | Suzuki–Miyaura                                                            | (DoE)-based adaptive response surface (D-optimal, G-optimal) | LC/MS                      | LabView , Matlab |
| 11   | Optimizing the Heck–Matsuda Reaction in Flow with a Constraint-Adapted Direct Search Algorithm                         | Daniel Cortés-Borda, Ksenia V. Kutonova, Corentin Jamet, Marina E. Trusova, Françoise Zammattio, Charlotte Truchet, Mireia Rodriguez-Zubiri, and François-Xavier Felpin | Org. Process Res. Dev. 2016, 20, 1979–1987           | Catalyst loading, residence time, equivalents                                                                         | Pd catalysed Heck–Matsuda                                                 | Constraint-adapted Nelder-Mead                               | Off-line GCMS              | Matlab           |
| 12   | Self-optimisation of the final stage in the synthesis of EGFR kinase inhibitor AZD9291 using an automated flow reactor | Nicholas Holmes, Geoffrey R. Akien, A. John Blacker, Robert L. Woodward, Rebecca E. Meadows and Richard A. Bourne                                                       | React. Chem. Eng., 2016, 1, 366-371                  | Equivalents, residence time, temperature                                                                              | Synthesis of N'-methylnicotinamide; Amide coupling+elimination            | SNOBFIT vs Central Composite Design (DoE)                    | Online HPLC, offline LC-MS | Matlab           |
| 13   | A Novel Internet-Based Reaction Monitoring, Control and Autonomous Self-Optimization Platform for Chemical Synthesis   | Daniel E. Fitzpatrick, Claudio Battilocchio, and Steven V. Ley                                                                                                          | Org. Process Res. Dev. 2016, 20, 2, 386-394          | a) 3D: temperature, concentration, residence time; b) 5D: temperature, residence time, equivalents (2), concentration | Nitrile oxidation to amide, Appel reaction to form bromides from alcohols | SIMPLEX                                                      | Online Mass Spec           | Internet-based   |
| 14   | Online monitoring and analysis for autonomous continuous flow self-optimizing reactor systems                          | D. C. Fabry , E. Sugiono and M. Rueping                                                                                                                                 | React. Chem. Eng., 2016, 1, 129-133                  | REVIEW                                                                                                                | REVIEW                                                                    | REVIEW                                                       | REVIEW                     | REVIEW           |

Table SI-1: References of the latest developments on self-optimization automated platforms (Cont.)

| Item | Title                                                                                                                                                       | Full authors list                                                                                                                                                                                                                           | Reference                                  | Variables                                           | Reaction                                                                                            | Algorithm                                                      | Analysis                   | Automation      |
|------|-------------------------------------------------------------------------------------------------------------------------------------------------------------|---------------------------------------------------------------------------------------------------------------------------------------------------------------------------------------------------------------------------------------------|--------------------------------------------|-----------------------------------------------------|-----------------------------------------------------------------------------------------------------|----------------------------------------------------------------|----------------------------|-----------------|
| 15   | Optimizing Chemical Reactions with Deep Reinforcement Learning                                                                                              | Zhenpeng Zhou , Xiaocheng Li, and Richard N. Zare                                                                                                                                                                                           | ACS Cent. Sci., 2017, 3 (12), 1337–1344    | Flowrate, pressure, voltage                         | Pomeranz–Fritsch, Friedländer synthesis, ribose phosphate synt., DCIP + ascorbicAcid, nanoparticles | DRO, CMA-ES, SNOBFIT, Nelder-Mead                              | Online Mass Spec           | n/a             |
| 16   | Self-optimisation and model-based design of experiments for developing a C–H activation flow process                                                        | A. Echtermeyer, Y. Amar, J. Zakrzewski, A. Lapkin                                                                                                                                                                                           | Beilstein J. Org. Chem. 2017, 13, 150–163. | Temperature, time, equivalents of acid and catalyst | Pd-catalysed C–H activation reaction of 1 resulting in the formation of an aziridine 2              | Model based DoE + Multiobjective Active Learning (MOAL)        | Inline UV cell+online GC   | Matlab          |
| 17   | Photoredox Iridium–Nickel Dual-Catalyzed Decarboxylative Arylation Cross-Coupling: From Batch to Continuous Flow via Self-Optimizing Segmented Flow Reactor | Hsiao-Wu Hsieh, Connor W. Coley, Lorenz M. Baumgartner, Klavs F. Jensen, and Richard I. Robinson                                                                                                                                            | Org. Process Res. Dev. 2018, 22, 542–550   | Temperature, residence time, organic bases          | Photoredox dual-catalyzed decarboxylative arylation cross-coupling                                  | (DoE)-based adaptive response surface (D-optimal, G-optimal)   | HPLC                       | Matlab          |
| 18   | An Autonomous Self-Optimizing Flow Reactor for the Synthesis of Natural Product Carpanone                                                                   | Daniel Cortés-Borda, Eric Wimmer, Boris Gouilleux, Elvina Barré, Nicolas Oger, Lubna Goulamaly, Louis Peault, Benoît Charrier, Charlotte Truchet, Patrick Giraudeau , Mireia Rodriguez-Zubiri, Erwan Le Grogneq, and François-Xavier Felpin | J. Org. Chem., 2018, 83 (23), 14286–14299  | Temperature, residence time, equivalents            | Synthesis of natural product Carpanone, Multistep synthesis                                         | Custom, based on Nelder-Mead and golden section search methods | Online HPLC or in-line NMR | Matlab          |
| 19   | Machine assisted reaction optimization: A self-optimizing reactor system for continuous-flow photochemical reactions                                        | K. Poscharny, D. Fabry, S. Heddrich, E. Sugiono, M. Liauw, M. Rueping                                                                                                                                                                       | Tetrahedron, 2018, 74 (25), 3171-3175      | Flowrates                                           | Photochemical reaction, [2 - 2] photocyclization reaction of benzophenone and furan                 | Modified Simplex                                               | FlowIR                     | LabVIEW, Matlab |
| 20   | Enhanced process development using automated continuous reactors by self-optimisation algorithms and statistical empirical modelling                        | Mohammed I.Jeraal, NicholasHolmes, Geoffrey R.Akien, Richard A.Bourne                                                                                                                                                                       | Tetrahedron, 2018, 74, (25), 3158-3164     | Flowrates (3), temperature                          | Claisen-Schmidt condensation between acetone and benzaldehyde to form benzylideneacetone            | SNOBFIT                                                        | HPLC                       | Matlab          |

Table SI-1: References of the latest developments on self-optimization automated platforms (Cont.)

| Item | Title                                                                                                                    | Full authors list                                                                                                                                        | Reference                            | Variables                                                                                                | Reaction                                                                                                                                                 | Algorithm                                                                                                                       | Analysis                                   | Automation      |
|------|--------------------------------------------------------------------------------------------------------------------------|----------------------------------------------------------------------------------------------------------------------------------------------------------|--------------------------------------|----------------------------------------------------------------------------------------------------------|----------------------------------------------------------------------------------------------------------------------------------------------------------|---------------------------------------------------------------------------------------------------------------------------------|--------------------------------------------|-----------------|
| 21   | Machine learning meets continuous flow chemistry: Automated optimization towards the Pareto front of multiple objectives | Artur M.Schweidtmann, Adam D.Clayton, NicholasHolmes, EricBradford, Richard A.Bournec, Alexei A. Lapkin                                                  | Chem. Eng. J. 2018, 352, 277-282     | Case1) esidence time, equivalents, concentration, temperature; Case 2) Four parameters for N-benzylation | Case 1) SNAr; Case 2) N-benzylation                                                                                                                      | Thompson Sampling Efficient Multi-Objective (TSEMO)                                                                             | HPLC                                       | Matlab          |
| 22   | OpenFlowChem – a platform for quick, robust and flexible automation and self-optimisation of flow chemistry              | Nikolay Cherkasov, Yang Bai, Antonio José Expósito and Evgeny V. Rebrov                                                                                  | React. Chem. Eng., 2018, 3, 769-780  | Flowrates (3)                                                                                            | Nitrobenzene hydrogenation, alkyne hydrogenation                                                                                                         | SNOBFIT                                                                                                                         | Online GC                                  | LabVIEW         |
| 23   | Precise Polymer Synthesis by Autonomous Self-Optimizing Flow Reactors                                                    | Maarten Rubens, Jeroen H. Vrijsen, Joachim Laun, and Tanja Junkers                                                                                       | Ang. Chem, 2019, 58 (10), 3183-3187  | Flowrates                                                                                                | Synthesis of polymers with precise weight distribution                                                                                                   | Custom, specifically designed to optimize the average molecular weight to a predefined target under optimal reaction conditions | Online SEC (Size exclusion chromatography) | LabVIEW         |
| 24   | Reconfigurable system for automated optimization of diverse chemical reactions                                           | Anne-Catherine Bédard, Andrea Adamo, Kosi C. Aroh, M. Grace Russell, Aaron A. Bedermann, Jeremy Torosian, Brian Yue, Klavs F. Jensen, Timothy F. Jamison | Science, 2018, 361, (6408) 1220-1225 | 3-5 variables                                                                                            | C-C and C-N cross-coupling, olefination, reductive amination, nucleophilic aromatic substitution (SNAr), photoredox catalysis, and a multistep sequence. | SNOBFIT                                                                                                                         | HPLC, IR, Raman, MS                        | LabVIEW, Matlab |
